# Supplementary material
Source: PubMed Central journal article supplement (PMC7849338)
Supplement: AET2-5-91-s001.pdf [file AET2-5-91-s001.pdf]

Appendix S1

**AWAEM Virtual Panel “The Female academic emergency physician in the time of COVID” Panelist Questions**

| Topic                                                                                                                        | Panel Questions                                                                                                                                                                                                                                                                                                                                                                                                |
|------------------------------------------------------------------------------------------------------------------------------|----------------------------------------------------------------------------------------------------------------------------------------------------------------------------------------------------------------------------------------------------------------------------------------------------------------------------------------------------------------------------------------------------------------|
| Equalizing the disproportionate clinical burden on the female workforce                                                      | <ul style="list-style-type: none"><li>• In regular times, female faculty often have heavier clinical loads because of their roles in resident education, and, as a result, their clinical time is less often bought down by grants and other funding streams. Has COVID-19 exacerbated this disparity? If so, have there been any efforts to equalize the differential load on the female workforce?</li></ul> |
| Finding solutions to work-life Integration                                                                                   | <ul style="list-style-type: none"><li>• Women tend to assume proportionately more home responsibilities. How has COVID-19 affected women's work life balance as many of us have taken on more household management, home schooling, elder care and general maintenance (cooking, cleaning, etc) roles? How does this intersect with other obligations on your time?</li></ul>                                  |
| Mitigating negative effects on academic productivity, specifically with regards to publications and professional advancement | <ul style="list-style-type: none"><li>• A recent piece in Nature highlighted the unique challenges for women to be academically productive during this time, and an article in The Lily discusses how currently far fewer women than men are submitting articles for publication. Has the pandemic impacted your academic productivity, and if so how? What</li></ul>                                          |

|                                                                                                           | have you done to address this?                                                                                                                                                                                                                                                                         |
|-----------------------------------------------------------------------------------------------------------|--------------------------------------------------------------------------------------------------------------------------------------------------------------------------------------------------------------------------------------------------------------------------------------------------------|
| Promoting leadership and visibility to be more responsive to the unique perspectives of its women faculty | <ul style="list-style-type: none"><li>• Were the faces/leaders of your institutions' (both department and university) response representative of the perspectives of the female faculty? Did policy changes seem considerate and reflective of the differential pressures on female faculty?</li></ul> |
| Recognizing and addressing mental health and wellness                                                     | <ul style="list-style-type: none"><li>• Have you noticed any mental health issues unique to women during COVID-19?</li><li>• What tactics or solutions have you found helpful with regards to mental health and wellness that we could advocate for at our own institutions?</li></ul>                 |

## Appendix S2

### **AWAEM Virtual Panel “The Female academic emergency physician in the time of COVID” Membership Survey Questions**

1. Did you attend the AWAEM Virtual Panel "The female academic emergency physician in the time of COVID" on Friday, May 15, 2020 at 10:00am?
  - a. Yes
  - b. No
2. How satisfied were you with the overall concept of this virtual panel? (1 = Not at all satisfied; 5 = Extremely satisfied)
  - a. 1
  - b. 2
  - c. 3
  - d. 4
  - e. 5
3. How relevant did you find this panel discussion to your clinical practice? (1 = Not important; 5 = Essential)
  - a. 1
  - b. 2
  - c. 3
  - d. 4
  - e. 5
4. How relevant did you find this panel discussion was to other aspects of your life, apart from your clinical practice (i.e. home life, personal well-being, academic or administrative roles, etc.)? (1 = Not important; 5 = Essential)
  - a. 1
  - b. 2
  - c. 3
  - d. 4
  - e. 5
5. How satisfied were you with the choice of panelists for this session? (1 = Not at all satisfied; 5 = Extremely satisfied)
  - a. 1
  - b. 2

- c. 3
  - d. 4
  - e. 5
6. How satisfied were you with the topics discussed during this virtual panel? (1 = Not at all satisfied; 5 = Extremely satisfied)
- a. 1
  - b. 2
  - c. 3
  - d. 4
  - e. 5
7. Can you provide any particular feedback regarding any of the topics discussed during the panel discussion? The topics discussed included COVID and its effects on: (1) clinical schedules; (2) work/life balance; (3) academic productivity; (4) leadership/visibility response; (5) mental health?
8. Did you utilize the chat function to engage with the panelists?
- a. Yes
  - b. No
9. How satisfied were you with the length of time for this virtual panel? (1 = Not at all satisfied; 5 = Extremely satisfied)
- a. 1
  - b. 2
  - c. 3
  - d. 4
  - e. 5
10. How satisfied were you with the ability of the moderators to facilitate the discussion? (1 = Not at all satisfied; 5 = Extremely satisfied)
- a. 1
  - b. 2
  - c. 3
  - d. 4
  - e. 5
11. Were there additional topics you would have liked to have seen discussed?
- a. Yes
  - b. No

12. If yes, what topics would you have liked to have seen discussed?
13. How do you feel the experience of this virtual panel compared to an in-person panel? (1 = not efficient; 5 = more efficient)
- a. 1
  - b. 2
  - c. 3
  - d. 4
  - e. 5
14. Would you recommend this virtual panel to other colleagues?
- a. Yes
  - b. No
  - c. Maybe
  - d. Other
15. We appreciate any additional feedback, including suggestions for future panels, so that we may continue to enhance the experience for future conferences
